1           Theaflavins, polyphenols of black tea, inhibit entry of hepatitis C virus

2

3

4   Pritom Chowdhury<sup>1,2</sup>, Marie-Emmanuelle Sahuc<sup>1</sup>, Yves Rouillé<sup>2</sup>, Alexandre Vandeputte<sup>1</sup>,  
5   Priscille Brodin<sup>1</sup>, Manoranjan Goswami<sup>2</sup>, Tanoy Bandyopadhyay<sup>3</sup>, Jean Dubuisson<sup>1</sup>, Karin  
6   Séron<sup>1\*</sup>

7

8

9   <sup>1</sup> Univ. Lille, CNRS, INSERM, CHU Lille, Institut Pasteur de Lille, U1019 - UMR 8204 - CIIL -  
10   Center for Infection and Immunity of Lille, Lille, France

11

12   <sup>2</sup> Department of Biotechnology, Tocklai Tea Research Institute, TRA, Jorhat, Assam, India

13

14   <sup>3</sup> Department of Biochemistry, Tocklai Tea Research Institute, TRA, Jorhat, Assam, India

15

16

17   \* Corresponding author

18   Email: [karin.seron@ibl.cnrs.fr](mailto:karin.seron@ibl.cnrs.fr)

## 19 **Abstract**

20 The treatment of hepatitis C virus (HCV) infection by combination of direct acting antivirals  
21 (DAA), with different mode of action, has made substantial progress in the past few years.  
22 However, appearance of resistance and high cost of the therapy is still an obstacle in the  
23 achievement of the therapy, more specifically in developing countries. In this context, search for  
24 affordable antivirals with new mechanisms of action is still needed. Tea, after water, is the most  
25 popular drink worldwide. Polyphenols extracted from green tea have already shown anti-HCV  
26 activity as entry inhibitors. Here, three different theaflavins, theaflavin (TF1), theaflavin-3'-  
27 monogallate (TF2), and theaflavin-3-3'-digallate (TF3), which are major polyphenols from black  
28 tea, were tested against HCV in cell culture. The results showed that all theaflavins inhibit HCV  
29 infection in a dose-dependent manner in an early step of infection. Results obtained with HCV  
30 pseudotyped virions confirmed their activity on HCV entry and demonstrated their pan-  
31 genotypic action. No effect on HCV replication was observed by using HCV replicon.  
32 Investigation on the mechanism of action of black tea theaflavins showed that they act directly  
33 on the virus particle and are able to inhibit cell-to-cell spread. Combination study with inhibitors  
34 most widely used in anti-HCV treatment regimen demonstrated that TF3 exerts additive effect.  
35 In conclusion, theaflavins, that are present in high quantity in black tea, are new inhibitors of  
36 HCV entry and hold promise for developing in therapeutic arsenal for HCV infection.

37

## 38 **Introduction**

39 Hepatitis C caused by hepatitis C virus (HCV) has been called silent epidemic. The majority of  
40 infections are asymptomatic, but in 20% of cases the virus persist, leading to chronic hepatitis (1)  
41 causing liver fibrosis and cirrhosis, which is often a prelude to hepatocellular carcinoma (2).  
42 Liver transplantation is often necessary in a portion of HCV infected patients (3). Tremendous  
43 efforts have been expended to develop efficacious prophylactic and therapeutic treatment  
44 regimen for chronic hepatitis C. No vaccine is available due, at least in part, to the high genomic  
45 variability of HCV, which has led to the distinction of seven genotypes, most of which have  
46 multiple subtypes (4). The therapeutic option against HCV has recently been improved with the

47 development of HCV direct acting antivirals (DAA) like Daclatasvir, Sofosbuvir and Simeprevir,  
48 targeting viral proteins NS5A, NS5B polymerase or NS3/4A protease, respectively (5). These  
49 approved DAA prominently increase the sustained viral response (SVR) up to ~95% in most  
50 patients, depending primarily on disease stage and the genotype of the infecting virus (5).  
51 However, treatment with DAAs is not without limitation; it is associated with side-effects,  
52 resurgence of infection in transplant patient and high cost especially in developing countries  
53 (6,7). Approved DAAs mainly target the virus replication leading to emergence of resistance  
54 mutations in this RNA virus genome (8). Thus, novel combinations of low cost entry inhibitors  
55 with conventional treatment targeting different stages of the HCV life cycle, may provide a  
56 promising approach against HCV drug resistance development and infection relapse (9).  
57 Moreover, prevention of donor liver re-infection by inhibiting viral entry into hepatocytes might  
58 be achieved using DAAs targeting entry.

59 Hepatitis C virus is an enveloped positive-stranded RNA virus encoding a polyprotein, co- and  
60 post-translationally cleaved into structural and non-structural proteins (10). Two viral  
61 glycoproteins E1 and E2 are part of the lipovirion envelope. Non-structural proteins, NS2  
62 to NS5B, are involved in replication and assembly of new virions. Actual antiviral therapy with  
63 DAA targets three non-structural proteins, the RNA-dependent RNA polymerase NS5B, a non-  
64 enzymatic protein involved in replication and assembly of HCV NS5A, and the viral protease  
65 NS3/4A, involved in polyprotein processing and essential for viral replication (11). Virus entry  
66 into hepatocytes is a multistep process that involves attachment of the particle to  
67 glycosaminoglycans and subsequent binding to entry factors, SR-B1, CD81, Claudin-1 and  
68 Occludin (12). After clathrin-mediated endocytosis and fusion of the viral envelope to  
69 endosomal membrane, the viral RNA is replicated, assembled and released via the secretory  
70 pathway.

71 In recent times, a wide variety of natural compounds have been extensively studied in terms of  
72 their antiviral activity (13). Polyphenols are one such group of compounds with potent antiviral  
73 activities. Earlier studies of others and our group have shown that epigallocatechin-3-gallate  
74 (EGCG), a major green tea polyphenol, inhibits HCV entry by a new mechanism of action (14–  
75 16). Recently, black tea polyphenols, theaflavins (TFs), components of black tea extract, have  
76 shown potent antiviral activities against calcivirus (17), herpes simplex virus 1 (HSV-1) (18),  
77 human immunodeficiency virus 1 (HIV-1) (19) and influenza A (20). Theaflavins are formed by

78 the enzymatic oxidation and decarboxylation of catechins during the manufacture of black tea  
79 (21). The most abundant TFs are theaflavin (TF1), theaflavin-3'-monogallate (TF2) and  
80 theaflavin-3,3'-digallate (TF3). Theaflavins share many of the structural characteristics of  
81 EGCG, which prompted us to screen theaflavins against HCV. We also aim to identify  
82 compounds with enhanced anti-HCV activity than previously studied compounds to boost the  
83 development of suitable inhibitors.

84 Here, we report the capacity of theaflavins to inhibit HCV infection *in vitro*, demonstrating their  
85 activity on HCV entry. Given the abundance of theaflavins, especially in tea growing areas, and  
86 popularity of tea as a drink next only to water and as health drink, the compounds hold promise  
87 for developing in therapeutic arsenal for HCV infection.

88

89

## 90 **Materials and Methods**

### 91 **Chemicals and antibodies**

92 DMEM, goat and fetal bovine sera were purchased from Invitrogen (Carlsbad, CA). 4',6-  
93 diamidino-2-phenylindole (DAPI) was from Molecular Probes (Invitrogen). EGCG used as a  
94 control was from Calbiochem (Merck Chemicals, Darmstadt, Germany). Theaflavin 3,3'-  
95 digallate used to compare with our extracted theaflavin, TF3, was from PhytoLab (Germany).  
96 Boceprevir was kindly provided by Philippe Halfon (Hôpital Européen, Laboratoire Alphabio,  
97 Marseille, France). Sofosbuvir (PSI-7977) and Daclatasvir (BMS-790052) were purchased from  
98 Selleckchem (Houston, USA). All other chemicals like DMSO were purchased from Sigma.  
99 Mouse anti-E1 monoclonal antibody (MAb) A4 was produced *in vitro* (22). Cy3-conjugated goat  
100 anti-mouse IgG was from Jackson Immunoresearch (West Grove, PA).

101

### 102 **Cells and virus strains**

103 Human hepatoma Huh-7 cells and human embryonic kidney HEK 293T cells were grown in  
104 Dulbecco's modified Eagle's medium (DMEM) supplemented with glutamax-I and 10% fetal  
105 bovine serum.

106 Japanese fulminant hepatitis-1 (JFH-1) HCV strain containing titer enhancing mutations (23) was  
107 used. Virus stocks were prepared by infecting Huh-7 cells with HCV JFH-1 (HCVcc) with a titer  
108 of  $10^6$  pfu/ml.

109

## 110 **Theaflavins extraction and stock preparation**

111 Crude theaflavin was extracted from prepared “crush tear curl” (CTC), black tea from Assam,  
112 India. The crude theaflavin in ethyl acetate was subjected to sephadex LH-20 column (Sigma)  
113 and eluted with 40% acetone solution. The elute with distinguished reddish colours for each of  
114 TF1, TF2 and TF3 was fractionated. Each fraction was concentrated by a rotary evaporator and  
115 lyophilized, and the three fractions of theaflavins recrystallized from dehydrated ethanol. The  
116 purity of the compounds was confirmed by HPLC, which was found to be up to 98%. Purified  
117 TF1, TF2, and TF3 were each dissolved in DMSO to produce stock solutions at a concentration  
118 of 250 mg/ml.

119

## 120 **Cytotoxicity assay**

121 Huh-7 cells were seeded in 96 well plates and incubated at 37°C for 24 h. Cultures of 60–70%  
122 confluency were treated with various concentrations of theaflavins. An MTS [3-(4, 5-  
123 dimethylthiazol-2-yl)-5-(3-carboxymethoxyphenyl)-2-(4-sulfophenyl)-2H-tetrazolium, inner  
124 salt] based assay (CellTiter 96 aqueous nonradioactive cell proliferation assay, Promega) was  
125 used to evaluate cell viability treated after 24, 48 and 72 h. DMSO was used as control.

126

## 127 **Immunofluorescence assay for anti-HCV quantification in confocal 128 microscopy**

129 Huh-7 cells were seeded in 96-well plates (6.000 cells/well) the day before infection. Cells were  
130 infected for 2 h with HCVcc at a multiplicity of infection (MOI) of 0.8. Then, the inoculum was  
131 removed and cells were overlaid with fresh medium. After 30 h, cells were fixed with ice-cold  
132 methanol and were processed for immunofluorescent detection of E1 envelope protein as  
133 described (24). Nuclei were stained with 1  $\mu$ g/ml DAPI. Confocal images were recorded using an  
134 automated confocal microscope InCell Analyzer 6000 (GE Healthcare Life Sciences). Each

135 image was then processed using the Columbus image analysis software (Perkin Elmer) as  
136 described (14).

137

### 138 **Time of addition assay**

139 Compounds were added before, during and after inoculation of Huh-7 cells with HCVcc. Briefly,  
140 cells were incubated in the presence or absence of compounds (pretreatment) for 1 h and  
141 subsequently replaced with virus for 1 h (inoculation). Inoculum was removed and replaced with  
142 DMEM for 28 h (post-inoculation). After 30 h cells were fixed and immunofluorescence  
143 detection was performed as described above.

144

### 145 **Direct effect on viral particle**

146 HCV was pre-incubated with 25 µg/ml of theaflavins for 1 h before inoculation, and then the  
147 mixture was diluted 10 times before being used for the inoculation (1 h at 37°C), leading to a  
148 final concentration of theaflavins of 2.5 µg/ml. In parallel, Huh-7 cells were inoculated with  
149 HCV in the presence of theaflavins either at 2.5 or 25 µg/ml. Importantly, the MOI was kept  
150 constant in all the conditions. Inoculum was removed and replaced with DMEM. After 30 h,  
151 immunofluorescence was performed as described above.

152

### 153 **Entry assay with HCV pseudo-particles (HCVpp)**

154 The luciferase-based HCV pseudotyped retroviral particles were generated as  
155 previously described (25). Briefly, HEK-293T cells were transfected with plasmids encoding  
156 HCV envelope proteins, Gag/Pol, and firefly luciferase. The HCV envelope plasmids included 6  
157 different genotypes (1b, 2a, 3a, 4, 5 and 6). The supernatants of the transfected cells were  
158 collected 72 h later and filtered through a 0.45-µm membrane. Vesicular stomatitis virus  
159 pseudoparticles (VSVpp) were used as a control. For the entry assay, Huh-7 cells were seeded on  
160 96-well plates overnight and incubated with HCVpp for 2 h at 37°C in the presence or not of  
161 theaflavins. Inoculum was replaced by DMEM and kept for 48 h. HCVpp entry into Huh-7 cells  
162 was measured by luciferase activity quantification using Luciferase Assay Kit (Promega) and a  
163 Berthold luminometer.

164

## 165 **HCV replicon and replication assay**

166 The plasmid pSGR-JFH1 encoding a sub-genomic replicon of JFH-1 strain was obtained from  
167 Dr T Wakita (26). A *Bgl*III and an *Nsi*I restriction sites were inserted between codons Pro419 and  
168 Leu420 of NS5A, and the coding sequence of enhanced green fluorescent protein (EGFP) was  
169 then inserted between these two sites. This position was previously shown to accept a GFP  
170 insertion in a sub-genomic replicon of the Con1 strain (27). The plasmid was in vitro transcribed  
171 before electroporation into Huh-7 cells. Cells that express replicon were selected for using 500  
172 µg/mL of geneticin during 15 days and cultured in a medium containing 250 µg/mL of geneticin.  
173 Huh-7 cells stably expressing replicon were seeded in 24-well plates and incubated with the  
174 different compounds for 24, 48 and 72 h. They were lysed in ice cold lysis buffer (Tris HCl  
175 50mM, NaCl 100 mM EDTA 2 mM Triton-100 1% SDS 0.1%) containing protease inhibitors for  
176 20 min. Cell lysates were collected and insoluble debris were removed by centrifugation. 20 µg  
177 of proteins were analyzed by western blotting using anti-NS5A and anti-β tubulin antibodies.  
178 Peroxidase-conjugated goat anti-mouse secondary antibody (Jackson Immunoresearch) was used  
179 for the revelation using ECL western blotting substrate (Thermo Fischer Scientific).

180

## 181 **Cell-to-cell transmission assay**

182 Huh-7 cells were infected with HCVcc at MOI of 0.01. After 2 hours of contact, the inoculum  
183 was removed and replaced with fresh DMEM containing TF1, TF2, TF3 at 25 µg/ml or DMSO  
184 along with neutralizing antibody mAb 3/11 to prevent infection via the cell culture medium. The  
185 cells were propagated for another 72 h prior to immunofluorescence staining as described above.  
186 Quantification was done in 3 independent wells by taking independent pictures of different field  
187 of each well.

188

## 189 **Statistical Analysis**

190 The statistical test used is a Kruskal Wallis nonparametric test followed by a Dunn's  
191 multicomparison post hoc test with a confidence interval of 95% to identify individual difference

192 between treatments. P values < 0.05 were considered as significantly different from the control.  
193 The data were analyzed using Graph Pad Prism (Version 5.0b) by comparisons between each  
194 treated group and untreated group (DMSO control).

195

196

## 197 **Results**

### 198 **Theaflavins inhibit HCV infection**

199 We and others have shown that EGCG, the major polyphenol present in green tea extract, was  
200 active against HCV infection (15,16,28), but no data are available on black tea polyphenols. In  
201 this context, three theaflavin derivatives, including TF1, TF2, and TF3, were extracted from CTC  
202 Assam black tea and identified by HPLC (Fig 1) with retention times of 10.49, 43.04, and 26.54  
203 min, respectively. The average molecular weight of TF1 (564.49 g/mole), TF2 (716.59 g/mole)  
204 and TF3 (868.709 g/mole) was used for calculating the molar concentration of theaflavins which  
205 were generally used in micrograms in the experiments.

206

207 **Fig 1. Chemical structures of theaflavins extracted from black tea.**

208

209 The inhibitory activity of theaflavins against HCV infectivity was carried out in dose-response  
210 experiment. Huh-7 cells were infected with HCV strain JFH1 in the presence of increasing  
211 concentrations of theaflavins, 0 to 100 µg/ml. Quantification of infected cells by  
212 immunofluorescence labeling of E1 envelope protein showed significantly decreased infectivity  
213 of HCV in the presence of each three theaflavins, with a clear dose-dependent inhibitory effect  
214 (Fig 2A). The half effective concentration (EC<sub>50</sub>) was calculated for each molecule to be 17.89,  
215 4.08, and 2.02 µM for TF1, TF2 and TF3, respectively. TF3 is the most active. We then tested  
216 the effect of theaflavins on cell viability by treating Huh-7 with a range of theaflavin  
217 concentrations that were used in inhibition experiments, 0 to 250 µg/ml, with three different  
218 exposure times, 24, 48 and 72 h (Fig 2B-D). Theaflavins did not decrease cell viability up to



219 100 µg/ml after short (24 h) to long (72 h) exposure times, a concentration much higher than the  
220 active antiviral concentrations.

221

222 **Fig 2. Theaflavins inhibit HCV infection.** (A) Huh-7 cells were inoculated with HCV JFH-1 in the  
223 presence of given concentration of the different theaflavins. Inoculum was removed and replaced with  
224 medium containing theaflavins. Cells were fixed at 30 h post-infection and subjected to  
225 immunofluorescence to quantify number of infected cells. Results are expressed relative to DMSO control  
226 without theaflavins (100%). Huh-7 cells were incubated with given concentrations of TF1 (B), TF2 (C) or  
227 TF3 (D) at different concentrations during 24, 48 or 72 h. Cell viability was measured using an MTS-  
228 based assay. Optical density at 490 nm was measured at the different time points. Results are expressed as  
229 mean ± SEM (error bars) of three independent experiments performed in triplicates and relative to control  
230 conditions without compounds.

231

## 232 **Theaflavins inhibit HCV entry and not replication**

233 The HCV infection cycle is a multistep process that involves entry of the virus into the cell,  
234 replication of the genomic RNA and assembly/release of viral particles. To determine at which  
235 step the different theaflavins exert their action, a time of addition experiment was performed.  
236 The compounds were added before, during or after inoculation of HCV to Huh-7 cells. EGCG,  
237 an inhibitor of HCV entry, and Boceprevir, a HCV NS3 protease inhibitor, were used as controls.  
238 The result clearly demonstrates a significant inhibition of HCV only in the presence of  
239 theaflavins added during inoculation, like EGCG (Fig 3A). There was no inhibition when  
240 compounds were added to cells prior to the infection or post-infection. As expected, Boceprevir  
241 inhibits the post-inoculation step, corresponding to replication. These results, taken together,  
242 suggest that theaflavins act at an early step of the viral infectious cycle, most probably the entry  
243 step.

244

245 **Fig 3. Theaflavins inhibit HCV entry in a pan-genotypic manner.** (A) Huh-7 cells were inoculated  
246 with HCV JFH-1 for 2 h and fixed at 30 h post-infection to quantify the number of infected cells.  
247 Theaflavins, at 25 µg/ml were either added for 2 h to the cells before infection (step 1), or during  
248 inoculation (step 2), or during the 28 h after inoculation (step 3), or during the 3 steps (step 1+2+3).

249 EGCG at 50  $\mu$ M or Boceprevir at 1  $\mu$ M were added either during the inoculation step or post-inoculation  
250 respectively. **(B-D)** Huh-7 cells were inoculated with HCVpp of the given genotypes or VSVpp in the  
251 absence (0) or presence of theaflavins at 2.5 or 25  $\mu$ g/ml. Cells were lysed 48h after infection and  
252 luciferase activity quantified. Results are expressed as mean  $\pm$  SEM (error bars) of 3 independent  
253 experiments performed in triplicate. Data are normalized to the DMSO, which is expressed as 100%  
254 infection.

255  
256 Viral pseudoparticles are good models for entry inhibitor assay and also for screening against  
257 different viral genotypes (29). To confirm that theaflavins act at the entry step, HCVpp were  
258 produced and inoculated to Huh-7 cells in the presence of each theaflavins at active  
259 concentrations ( $EC_{50}$  and  $10 \times EC_{50}$ ). Envelope glycoproteins of different HCV genotypes were  
260 used, genotype 1b, 2a, 3a, 4, 5 and 6. The result shows that all the theaflavins inhibit infection of  
261 HCVpp in a dose dependent manner (Fig 3B-D) confirming their activity on HCV entry.  
262 Moreover, the antiviral activity of each theaflavin is pan-genotypic, with an inhibition of  
263 infection for all HCV genotype tested. HCVpp of genotype 3a are less inhibited by theaflavins  
264 than HCVpp of other genotypes, even if TF3 seems more active on this genotype than TF1 or  
265 TF2.

266 Results presented in Fig 3A suggest that theaflavins are not active on HCV replication because  
267 no inhibitory effect was observed when the compounds were added during the 28 h post-  
268 inoculation. To confirm this data, HCV subgenomic replicon containing a GFP-tagged NS5A  
269 was used. Replicon cells were incubated with TF1, TF2 or TF3 at 25  $\mu$ g/ml, or Boceprevir at  
270 1  $\mu$ M, for 72 h. NS5A protein quantified by Western blot analysis. The result shows that the  
271 replication of the replicon is not affected by the presence of any of the theaflavins but is inhibited  
272 by Boceprevir (Fig 4). Taken together, our results show the TF1, TF2 and TF3 are inhibitors of  
273 HCV entry and not replication.

274  
275 **Fig 4. Theaflavins are not inhibitors of HCV replication.** Huh-7 cells expressing a HCV replicon  
276 containing a GFP-tagged NS5A were incubated in the absence (DMSO) or presence of theaflavins at 25  
277  $\mu$ g/ml, or Boceprevir at 1  $\mu$ M, for 72 h. Cells were lysed and Western blot analysis was performed to  
278 detect NS5A-GFP and tubulin with specific antibodies. Data are representative of 3 independent  
279 experiments.

280

## 281 **Theaflavins act directly on the viral particle**

282 Theaflavins can inhibit HCV entry by acting either directly on the viral particle or on cellular  
283 factors. This second hypothesis seems unlikely because no effect of theaflavins on HCV  
284 infection was observed when cells were pre-treated with the molecules before infection (Fig 3A).  
285 To determine if theaflavins act directly on the viral particle, HCV viral stocks were incubated  
286 with the compounds at 25 µg/ml prior inoculation. The viral stocks containing the compounds  
287 were then diluted 10 times before inoculation leading to a final concentration of theaflavins of  
288 2.5 µg/ml for the inoculation step. In parallel, cells were inoculated with a non-treated virus in  
289 the presence of the compounds at the two different concentrations, 2.5 and 25 µg/ml. As shown  
290 in Fig 5, the inhibitory effect of theaflavins on pre-incubated virus is similar to the one observed  
291 when virus is inoculated on cells at high concentration (25 µg/ml), demonstrating that theaflavins  
292 act directly on HCV particle before entry.

293

294 **Fig 5. Theaflavins act on the viral particles prior inoculation.** HCV virus stock was pre-incubated with  
295 25 µg/ml of theaflavins for 1 h before inoculation, and then the mixture was diluted 10 times before being  
296 used for the inoculation, leading to a final concentration of theaflavins of 2.5 µg/ml. In parallel, Huh-7  
297 cells were inoculated with HCV in the presence of theaflavins either at 2.5 or 25 µg/ml. Cells were fixed  
298 and subjected to immunofluorescence to quantify infected cells as described above. Data are normalized  
299 to the DMSO, which is expressed as 100% infection. The results are presented as means ± SEM of three  
300 independent experiments performed in triplicate.

301

## 302 **Theaflavins inhibit HCV cell-to-cell propagation**

303 HCV infection can follow two different modes of transmission, either by direct entry into the cell  
304 via extracellular medium or via cell-to-cell spread between two neighboring cells. This last mode  
305 of transmission is resistant to neutralizing antibodies and seems to be a major way of HCV  
306 infection (30). Therefore, it is important to identify antiviral agents able to block cell-to-cell  
307 transmission. To determine if theaflavins can inhibit HCV cell-to-cell spread, Huh-7 cells were  
308 infected with HCVcc with no inhibitor, at low MOI to visualize foci, and further incubated with  
309 theaflavins in the presence of neutralizing antibodies to prevent extracellular infection. 72 h post-

310 infection, the number of cells in the foci were quantified. The results shows that TF1, TF2 and  
311 TF3 significantly reduce number of cells in the foci meaning reduction in cell-to-cell spread  
312 (Fig 6), like EGCG a known inhibitor of cell-to-cell transmission (15). This shows that  
313 theaflavins are potent inhibitors of both HCV modes of entry.

314

315 **Fig 6. Theaflavins inhibit cell-to-cell spread.** Huh-7 cells were inoculated with HCV JFH-1 for 2 h.  
316 Inoculum was replaced by medium containing mAb 3/11 neutralizing antibody to prevent extracellular  
317 propagation. Theaflavins at 25 µg/ml or EGCG at 50 µM were added in the medium after inoculation.  
318 Cells were fixed 72 h after infection and subjected to immunofluorescence detection of E1 HCV envelope  
319 protein as described. The number of cells/focus of 3 independent fields of three independent wells was  
320 quantified. Error bars represent SD. Data are representative of 3 independent experiments. Statistical  
321 analysis were performed with the Kruskal Wallis nonparametric test followed by a Dunn's  
322 multicomparison post hoc test. \*\*, P < 0.01; \*\*\*, P < 0.005.

323

## 324 **Combination of theaflavins with replication inhibitors used in** 325 **hepatitis C therapy**

326 Finally, in order to determine the potential use of these compounds in antiviral therapy, we  
327 interrogated the effect of theaflavins in combination with the known DAA Sofosbuvir and  
328 Daclatasvir, two inhibitors of HCV replication that target HCV proteins NS5B and NS5A  
329 respectively (31,32). In the experiment, TF3, the most active theaflavin, was added at different  
330 concentrations along with Sofosbuvir or Daclatasvir at fixed concentration during infection of  
331 Huh-7 cells with HCVcc. The result shows that TF3 can increase the antiviral activity of both  
332 Sofosbuvir and Daclatasvir in an additive manner (Fig 7) demonstrating that it could be use in  
333 combination with DAA used in hepatitis C therapy.

334

335 **Fig 7. Theaflavins can be used in combination with DAA.** Huh-7 cells were inoculated with HCV JFH-  
336 1 in the presence of TF3 at given concentrations. Inoculum was removed and replaced by medium  
337 containing or not either Daclatasvir at 6 pM or Sofosbuvir at 400 nM. Cells were fixed at 30 h post  
338 infection and subjected to immunofluorescent detection of E1 envelope protein. Results are expressed as  
339 mean +/- SEM (error bars) of 3 independent experiments performed in triplicate. Data are normalized to  
340 DMSO, which is expressed as 100% infection.

341

## 342 **Discussion**

343 The present study identified new entry inhibitors of HCV, theaflavins, the major black tea  
344 polyphenols. Theaflavins inhibit all HCV genotypes and most probably induce inactivation of  
345 the viral particle before inoculation. Interestingly, they are also able to inhibit cell-to-cell spread  
346 of HCV, a major route of infection allowing evasion of the virus from neutralizing antibodies  
347 (30). Moreover, an additive action of TF3 in combination with molecules used for hepatitis C  
348 therapy was observed.

349 HCV is transmitted between hepatocytes via classical cell entry but also uses direct cell-to-cell  
350 transfer to infect neighboring hepatocytes. Cell-to-cell transmission was also shown to play an  
351 important role in dissemination and maintenance of resistant variants in cell culture models (33).  
352 HCV entry is highly orchestrated and essential in initiating viral infection and spread. This step  
353 represents a potential target for HCV inhibitors (34,35) but, up to now, no HCV entry inhibitor  
354 has been marketed, and few are in preclinical trial. The currently used therapy of DAA regimen  
355 cures more than 90% of infected patients, but the appearance of viral resistance, and recurrence  
356 of infection particularly in transplant patients is still a major limitation (36). Entry inhibitors  
357 given along with the DAAs would be expected to exhibit a synergistic effect (34,35). The present  
358 study supported this hypothesis when theaflavin and Sofosbuvir or Daclatasvir were added in  
359 combination and showed additive effect against HCV. This may lead to pivotal implication in  
360 therapeutic regimen of HCV especially because Sofosbuvir, in combination with other drugs, is a  
361 part of all first-line treatments for HCV, and also of some second-line treatments (36).

362 HCV treatment efficacy is influenced by infected viral genotype; therefore, treatment regimen is  
363 dependent on genotypes infected. Our study with HCVpp of different genotypes (1-6) showed  
364 dose-dependent inhibition of HCV by theaflavins (Fig 3B-D). This represents an important hit  
365 for further drug development.

366 In recent times, a number of promising natural products with anti-HCV activities have been  
367 discovered (37–39). They are of different origins and chemical structures and exert their antiviral  
368 effects at different levels within the virus life cycle. While green tea polyphenols have received  
369 the most attention in the past years, data presented in this study suggest that black tea theaflavins  
370 may also be potent candidates for antiviral drug development particularly as entry inhibitors

371 against HCV. Our data show that TF3 has the most prominent effect against HCV in comparison  
372 to TF1 and TF2. TF3 ( $EC_{50} = 2.2 \mu\text{M}$ ) also is more potent than EGCG ( $EC_{50} = 10.6 \mu\text{M}$ ) (14).

373 Our results clearly indicate that all the three derivatives of theaflavin act directly on viral  
374 particles and may prevent cell surface attachment or receptor binding. In our earlier study cryo-  
375 electron microscopy imaging showed that EGCG and delphinidin, an anthocyanidin, have a  
376 bulging effect on HCV envelope of HCVpp (14). We might speculate that theaflavins might have  
377 similar effect as both polyphenols shared close structural similarity. However, the exact  
378 mechanism of action of theaflavins on HCV infection needs further studies.

379 TF3 seems to be most promising candidate against HCV and its efficacy may be attributed to the  
380 presence of double galloyl moiety. The same has been found for HSV-1 where TF3 was reported  
381 to be most effective (18). In contrast, the presence of the galloyl group in TF3 is not necessary  
382 for antiviral properties against calcivirus where all three theaflavin derivatives have similar  
383 efficacy (17). To understand the role of functional groups and galloyl moiety, further study is  
384 required through the approach of combinatorial and synthetic chemistry. It is interesting to note  
385 that theaflavins and EGCG have been described to inactivate the same viruses, HSV-1, HIV-1  
386 and influenza virus (18–20,40). Taken together with the results presented here, it seems that  
387 these polyphenols from tea, black or green, have a very specific mode of action on enveloped  
388 viruses that could be more exploited in the context of antiviral therapy.

389 A future prospect of our study may be to determine the bioavailability of theaflavins in human  
390 liver. Henning et al performed study on liver tissue of mice after black tea consumption and  
391 showed that theaflavin relative absorption in liver is twice higher than EGCG (41). TF1  
392 concentration in mice liver is estimated at  $0.4 \text{ nmol g}^{-1}$  tissue, approximately  $0.4 \mu\text{M}$ . In contrast,  
393 TF2 and TF3 are poorly detected. Theaflavin content may vary from one tea to another. It has  
394 been shown that Assam black tea contains more theaflavins than Darjeeling tea, and particularly  
395 TF3 (125.9 and  $26.8 \mu\text{g/ml}$  respectively) (42), which could lead to higher relative absorption.  
396 Even if the tissue concentrations of theaflavins are lower than their active concentrations, their  
397 use in combination with other DAA might reduce their  $EC_{50}$  as shown in Fig 7. Taken together,  
398 these results may be of crucial importance in developing a prophylactic drug for HCV risk group  
399 population.

400 In conclusion, the present study identified theaflavins as new entry inhibitors of HCV infection.  
401 Their pan-genotypic action and ability to inhibit cell-to-cell spread are major advantages for

402 further evaluation for drug development, as well as their efficacy in combination with actual  
403 antiviral therapy. Moreover, their ease of extracting, availability and popularity of tea as a drink  
404 make them interesting candidate as entry inhibitors against HCV infection.

405

406

407

## 408 **Acknowledgements**

409 The authors are thankful to Department of Health Research, Ministry of Health and Family  
410 welfare, Government of India, for providing post-doctoral overseas training fellowship to P.  
411 Chowdhury. The authors are also thankful to Director, TTRI and Secretary, TRA for their  
412 support to implement the research fellowship grant.

413

414

415

## 416 **References**

- 417 1. Bartenschlager R, Lohmann V, Penin F. The molecular and structural basis of advanced  
418 antiviral therapy for hepatitis C virus infection. *Nat Rev Microbiol.* 2013 Jul;11(7):482–96.
- 419 2. Jacobson IM, Davis GL, El-Serag H, Negro F, Trépo C. Prevalence and challenges of liver  
420 diseases in patients with chronic hepatitis C virus infection. *Clin Gastroenterol Hepatol.*  
421 2010 Nov;8(11):924–33; quiz e117.
- 422 3. Stepanova M, Sayiner M, Avila L de, Younoszai Z, Racila A, Younossi ZM. Long-term  
423 outcomes of liver transplantation in patients with hepatitis C infection are not affected by  
424 HCV positivity of a donor. *BMC Gastroenterol.* 2016 Dec;16(1):137.
- 425 4. Simmonds P. The origin of hepatitis C virus. *Curr Top Microbiol Immunol.* 2013;369:1–15.
- 426 5. Asselah Tarik, Boyer Nathalie, Saadoun David, Martinot- Peignoux Michele, Marcellin  
427 Patrick. Direct-acting antivirals for the treatment of hepatitis C virus infection: optimizing  
428 current IFN-free treatment and future perspectives. *Liver Int.* 2016 Jan 4;36(S1):47–57.
- 429 6. Konerman MA, Lok ASF. Hepatitis C Treatment and Barriers to Eradication. *Clin Transl*  
430 *Gastroenterol.* 2016 Sep 22;7(9):e193.
- 431 7. Lynch SM, Wu GY. Hepatitis C Virus: A Review of Treatment Guidelines, Cost-  
432 effectiveness, and Access to Therapy. *J Clin Transl Hepatol.* 2016 Dec 28;4(4):310–9.



- 433 8. Behrens SE, Tomei L, De Francesco R. Identification and properties of the RNA-dependent  
434 RNA polymerase of hepatitis C virus. *EMBO J.* 1996 Jan 2;15(1):12–22.
- 435 9. Baumert TF, Jühling F, Ono A, Hoshida Y. Hepatitis C-related hepatocellular carcinoma in  
436 the era of new generation antivirals. *BMC Med.* 2017 14;15(1):52.
- 437 10. Lindenbach BD, Thiel H-J, Rice CM. Flaviviridae: the viruses and their replication. In:  
438 *Fields Virology 5th Edition.* Wolters Kluwer, Lippincott, William & Wilkins. David M.  
439 Knipe, Peter M. Howley; 2007. p. 1101–52.
- 440 11. Asselah Tarik, Marcellin Patrick, Schinazi Raymond F. Treatment of hepatitis C virus  
441 infection with direct-acting antiviral agents: 100% cure? *Liver Int.* 2018 Feb 10;38(S1):7–  
442 13.
- 443 12. Bartosch B, Dubuisson J. Recent Advances in Hepatitis C Virus Cell Entry. *Viruses.* 2010  
444 Mar 8;2(3):692–709.
- 445 13. Kitazato K, Wang Y, Kobayashi N. Viral infectious disease and natural products with  
446 antiviral activity. *Drug Discov Ther.* 2007 Aug;1(1):14–22.
- 447 14. Calland N, Sahuc M-E, Belouzard S, Pène V, Bonnafous P, Mesalam AA, et al.  
448 Polyphenols Inhibit Hepatitis C Virus Entry by a New Mechanism of Action. *J Virol.* 2015  
449 Jan 10;89(19):10053–63.
- 450 15. Calland N, Albecka A, Belouzard S, Wychowski C, Duverlie G, Descamps V, et al. (-)-  
451 Epigallocatechin-3-gallate is a new inhibitor of hepatitis C virus entry. *Hepatology* Baltim Md.  
452 2012 Mar;55(3):720–9.
- 453 16. Ciesek S, Von Hahn T, Colpitts CC, Schang LM, Friesland M, Rg Steinmann J, et al. The  
454 Green Tea Polyphenol, Epigallocatechin-3-Gallate, Inhibits Hepatitis C Virus Entry.  
455 *Hepatology.* 2011;54:1947–1955.
- 456 17. Ohba M, Oka T, Ando T, Arahata S, Ikegaya A, Takagi H, et al. Antiviral effect of  
457 theaflavins against caliciviruses. *J Antibiot (Tokyo).* 2017 Apr;70(4):443–7.
- 458 18. de Oliveira A, Prince D, Lo C-Y, Lee LH, Chu T-C. Antiviral activity of theaflavin  
459 digallate against herpes simplex virus type 1. *Antiviral Res.* 2015 Jun;118:56–67.
- 460 19. Yang J, Li L, Tan S, Jin H, Qiu J, Mao Q, et al. A natural theaflavins preparation inhibits  
461 HIV-1 infection by targeting the entry step: potential applications for preventing HIV-1  
462 infection. *Fitoterapia.* 2012 Mar;83(2):348–55.
- 463 20. Zu M, Yang F, Zhou W, Liu A, Du G, Zheng L. In vitro anti-influenza virus and anti-  
464 inflammatory activities of theaflavin derivatives. *Antiviral Res.* 2012 Jun;94(3):217–24.
- 465 21. Tanaka T, Matsuo Y, Kouno I. Chemistry of secondary polyphenols produced during  
466 processing of tea and selected foods. *Int J Mol Sci.* 2009 Dec 28;11(1):14–40.



- 467 22. Dubuisson J, Hsu HH, Cheung RC, Greenberg HB, Russell DG, Rice CM. Formation and  
468 intracellular localization of hepatitis C virus envelope glycoprotein complexes expressed by  
469 recombinant vaccinia and Sindbis viruses. *J Virol.* 1994 Jan 10;68(10):6147–60.
- 470 23. Delgrange D, Pillez A, Castelain S, Cocquerel L, Rouillé Y, Dubuisson J, et al. Robust  
471 production of infectious viral particles in Huh-7 cells by introducing mutations in hepatitis  
472 C virus structural proteins. *J Gen Virol.* 2007;88(9):2495–503.
- 473 24. Rouillé Y, Helle F, Delgrange D, Roingard P, Voisset C, Blanchard E, et al. Subcellular  
474 Localization of Hepatitis C Virus Structural Proteins in a Cell Culture System That  
475 Efficiently Replicates the Virus. *J Virol.* 2006 Mar 15;80(6):2832–41.
- 476 25. Bartosch B, Dubuisson J, Cosset F-L. Infectious Hepatitis C Virus Pseudo-particles  
477 Containing Functional E1–E2 Envelope Protein Complexes. *J Exp Med.* 2003 Mar  
478 3;197(5):633–42.
- 479 26. Kato T, Date T, Miyamoto M, Furusaka A, Tokushige K, Mizokami M, et al. Efficient  
480 replication of the genotype 2a hepatitis C virus subgenomic replicon. *Gastroenterology.*  
481 2003 Dec;125(6):1808–17.
- 482 27. Moradpour D, Evans MJ, Gosert R, Yuan Z, Blum HE, Goff SP, et al. Insertion of Green  
483 Fluorescent Protein into Nonstructural Protein 5A Allows Direct Visualization of  
484 Functional Hepatitis C Virus Replication Complexes. *J Virol.* 2004 Jul 15;78(14):7400–9.
- 485 28. Chen C, Qiu H, Gong J, Liu Q, Xiao H, Chen XW, et al. (-)-Epigallocatechin-3-gallate  
486 inhibits the replication cycle of hepatitis C virus. *Arch Virol.* 2012;157:1301–1312.
- 487 29. Urbanowicz RA, McClure CP, King B, Mason CP, Ball JK, Tarr AW. Novel functional  
488 hepatitis C virus glycoprotein isolates identified using an optimized viral pseudotype entry  
489 assay. *J Gen Virol.* 2016;97(9):2265–79.
- 490 30. Timpe JM, Stamataki Z, Jennings A, Hu K, Farquhar MJ, Harris HJ, et al. Hepatitis C virus  
491 cell-cell transmission in hepatoma cells in the presence of neutralizing antibodies.  
492 *Hepatology.* 2008 Jan 1;47(1):17–24.
- 493 31. Lam AM, Murakami E, Espiritu C, Steuer HMM, Niu C, Keilman M, et al. PSI-7851, a  
494 Pronucleotide of beta-D-2'-Deoxy-2'-Fluoro-2'-C-Methyluridine Monophosphate, Is a  
495 Potent and Pan-Genotype Inhibitor of Hepatitis C Virus Replication. *Antimicrob Agents  
496 Chemother.* 2010 Aug;54(8):3187–96.
- 497 32. Gao M, Nettles RE, Belema M, Snyder LB, Nguyen VN, Fridell RA, et al. Chemical  
498 genetics strategy identifies an HCV NS5A inhibitor with a potent clinical effect. *Nature.*  
499 2010 May 6;465(7294):96–U108.
- 500 33. Xiao F, Fofana I, Heydmann L, Barth H, Soulier E, Habersetzer F, et al. Hepatitis C virus  
501 cell-cell transmission and resistance to direct-acting antiviral agents. *PLoS Pathog.* 2014  
502 May;10(5):e1004128.

- 503 34. Zeisel MB, Fofana I, Fafi-Kremer S, Baumert TF. Hepatitis C virus entry into hepatocytes:  
504 molecular mechanisms and targets for antiviral therapies. *J Hepatol.* 2011 Mar;54(3):566–  
505 76.
- 506 35. Colpitts CC, Baumert TF. Hepatitis C virus cell entry: a target for novel antiviral strategies  
507 to address limitations of direct acting antivirals. *Hepatol Int.* 2016 Apr 5;1–8.
- 508 36. Li G, De Clercq E. Current therapy for chronic hepatitis C: The role of direct-acting  
509 antivirals. *Antiviral Res.* 2017;142:83–122.
- 510 37. Calland N, Dubuisson J, Rouillé Y, Séron K. Hepatitis C virus and natural compounds: a  
511 new antiviral approach? *Viruses.* 2012 Oct;4(10):2197–217.
- 512 38. Ashfaq UA, Idrees S. Medicinal plants against hepatitis C virus. *World J Gastroenterol.*  
513 2014 Mar 21;20(11):2941–7.
- 514 39. Séron K, Sahuc M-E, Rouillé Y. Natural products and hepatitis C virus. In: *Natural*  
515 *Antimicrobial Agents.* Springer Nature. Jean-Michel Mérillon and Céline Riviere; 2018. p.  
516 in press. (Sust. Devel., Biodivers.,; vol. 19).
- 517 40. Liu S, Lu H, Zhao Q, He Y, Niu J, Debnath AK, et al. Theaflavin derivatives in black tea  
518 and catechin derivatives in green tea inhibit HIV-1 entry by targeting gp41. *Biochim*  
519 *Biophys Acta.* 2005 May 25;1723(1–3):270–81.
- 520 41. Henning SM, Aronson W, Niu Y, Conde F, Lee NH, Seeram NP, et al. Tea polyphenols and  
521 theaflavins are present in prostate tissue of humans and mice after green and black tea  
522 consumption. *J Nutr.* 2006 Jul;136(7):1839–43.
- 523 42. Ganguly S, G TK, Mantha S, Panda K. Simultaneous Determination of Black Tea-Derived  
524 Catechins and Theaflavins in Tissues of Tea Consuming Animals Using Ultra-Performance  
525 Liquid-Chromatography Tandem Mass Spectrometry. *PLoS ONE.* 2016 Oct  
526 3;11(10):e0163498.
- 527

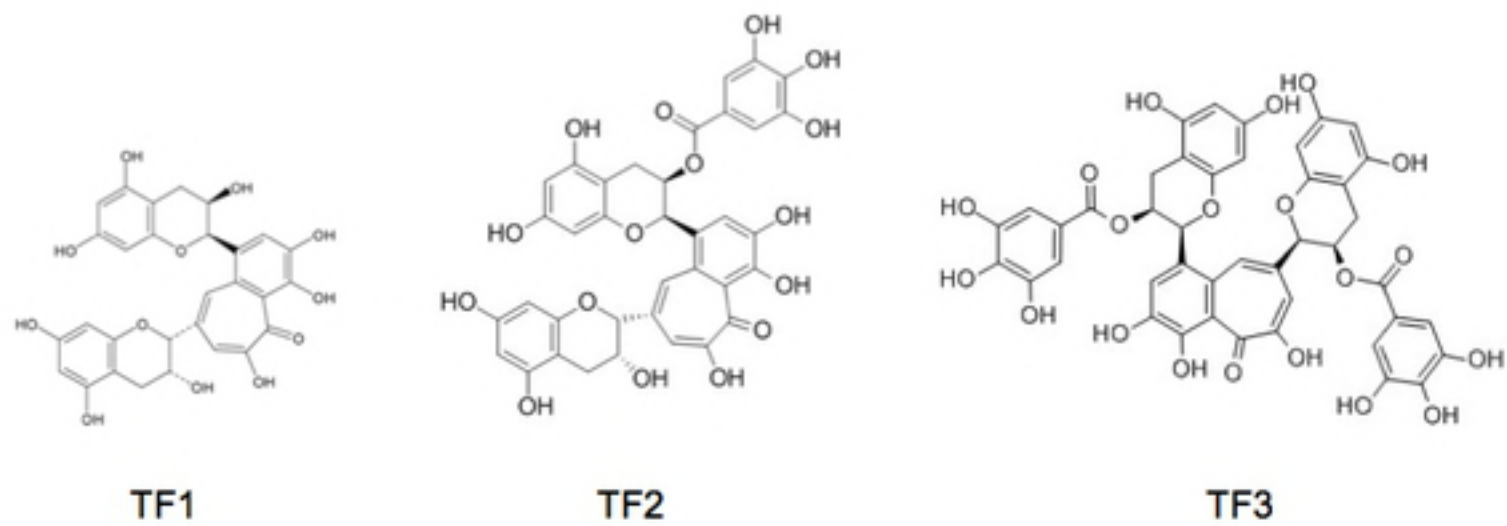

**Figure 1**

bioRxiv preprint doi: <https://doi.org/10.1101/325126>; this version posted May 7, 2018. The copyright holder for this preprint (which was not certified by peer review) is the author/funder, who has granted bioRxiv a license to display the preprint in perpetuity. It is made available under aCC-BY 4.0 International license.

**A**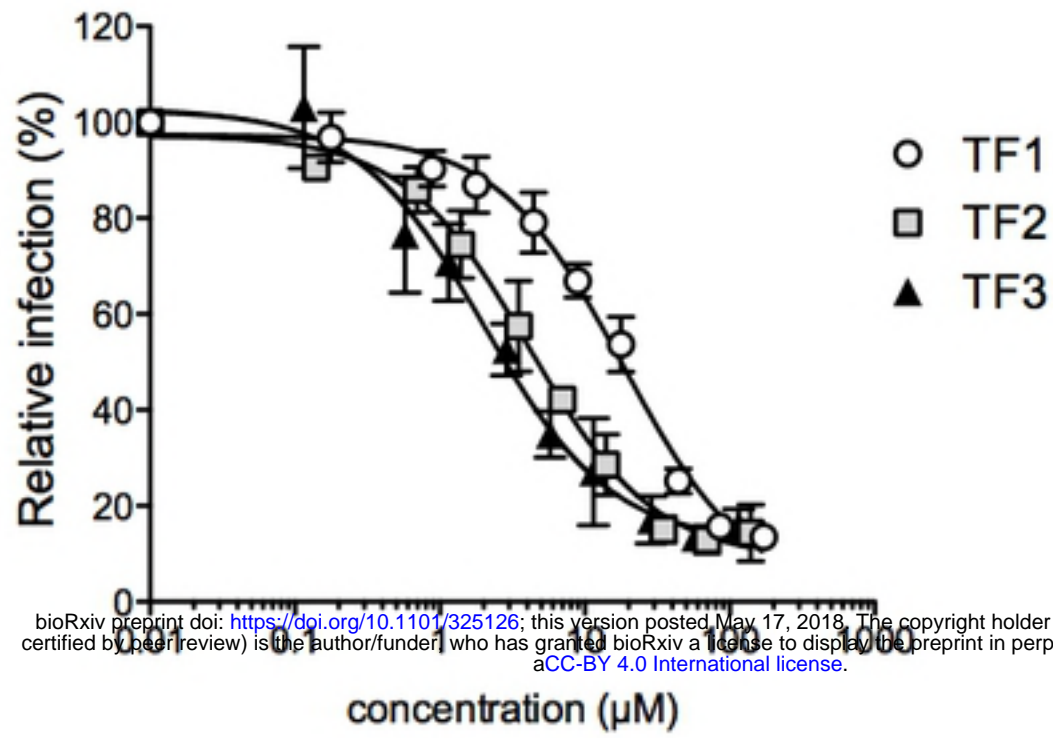**B**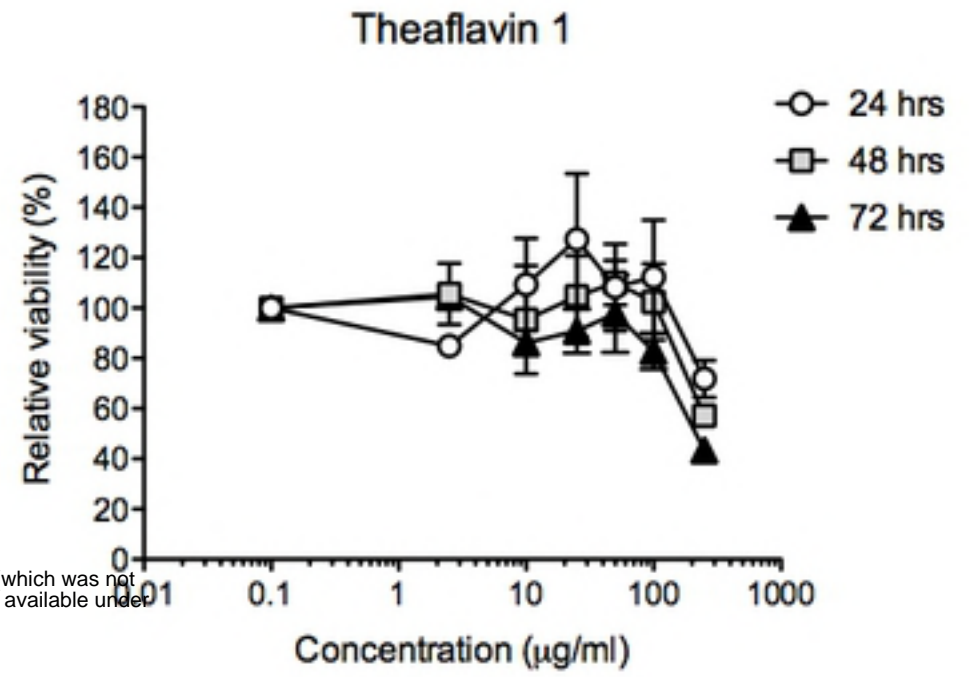**C**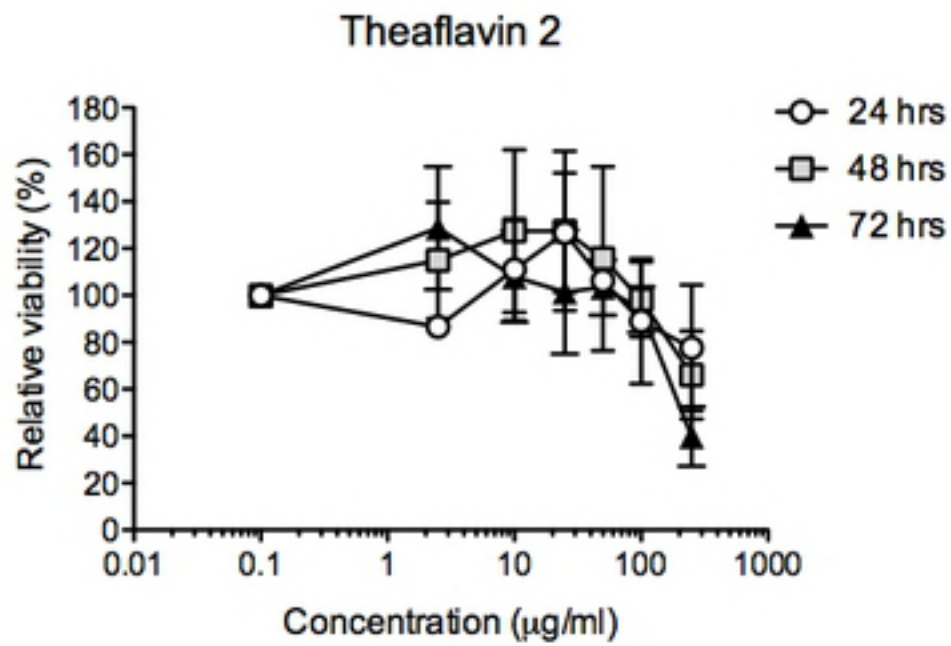**D**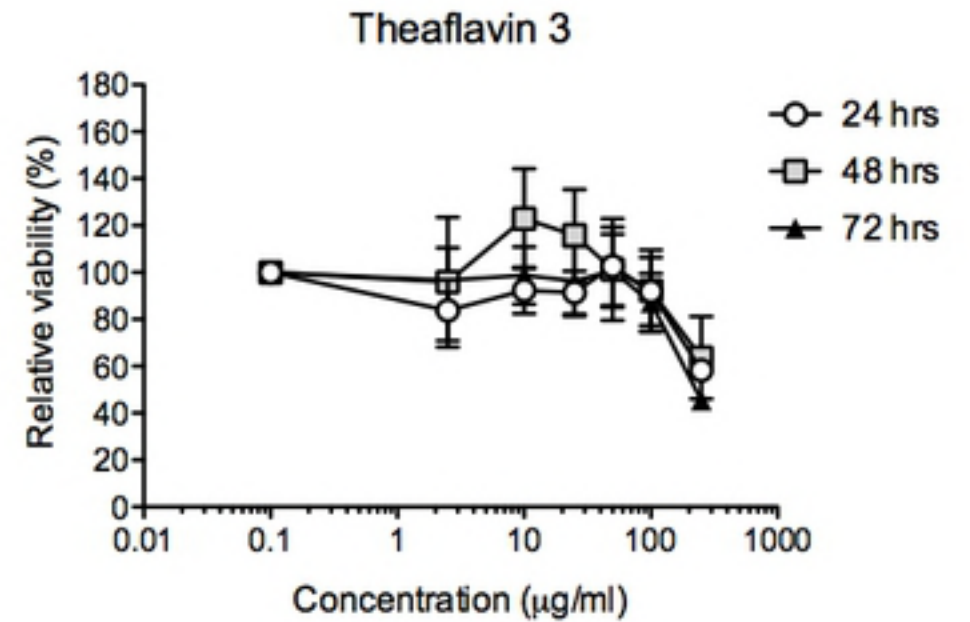**Figure 2**

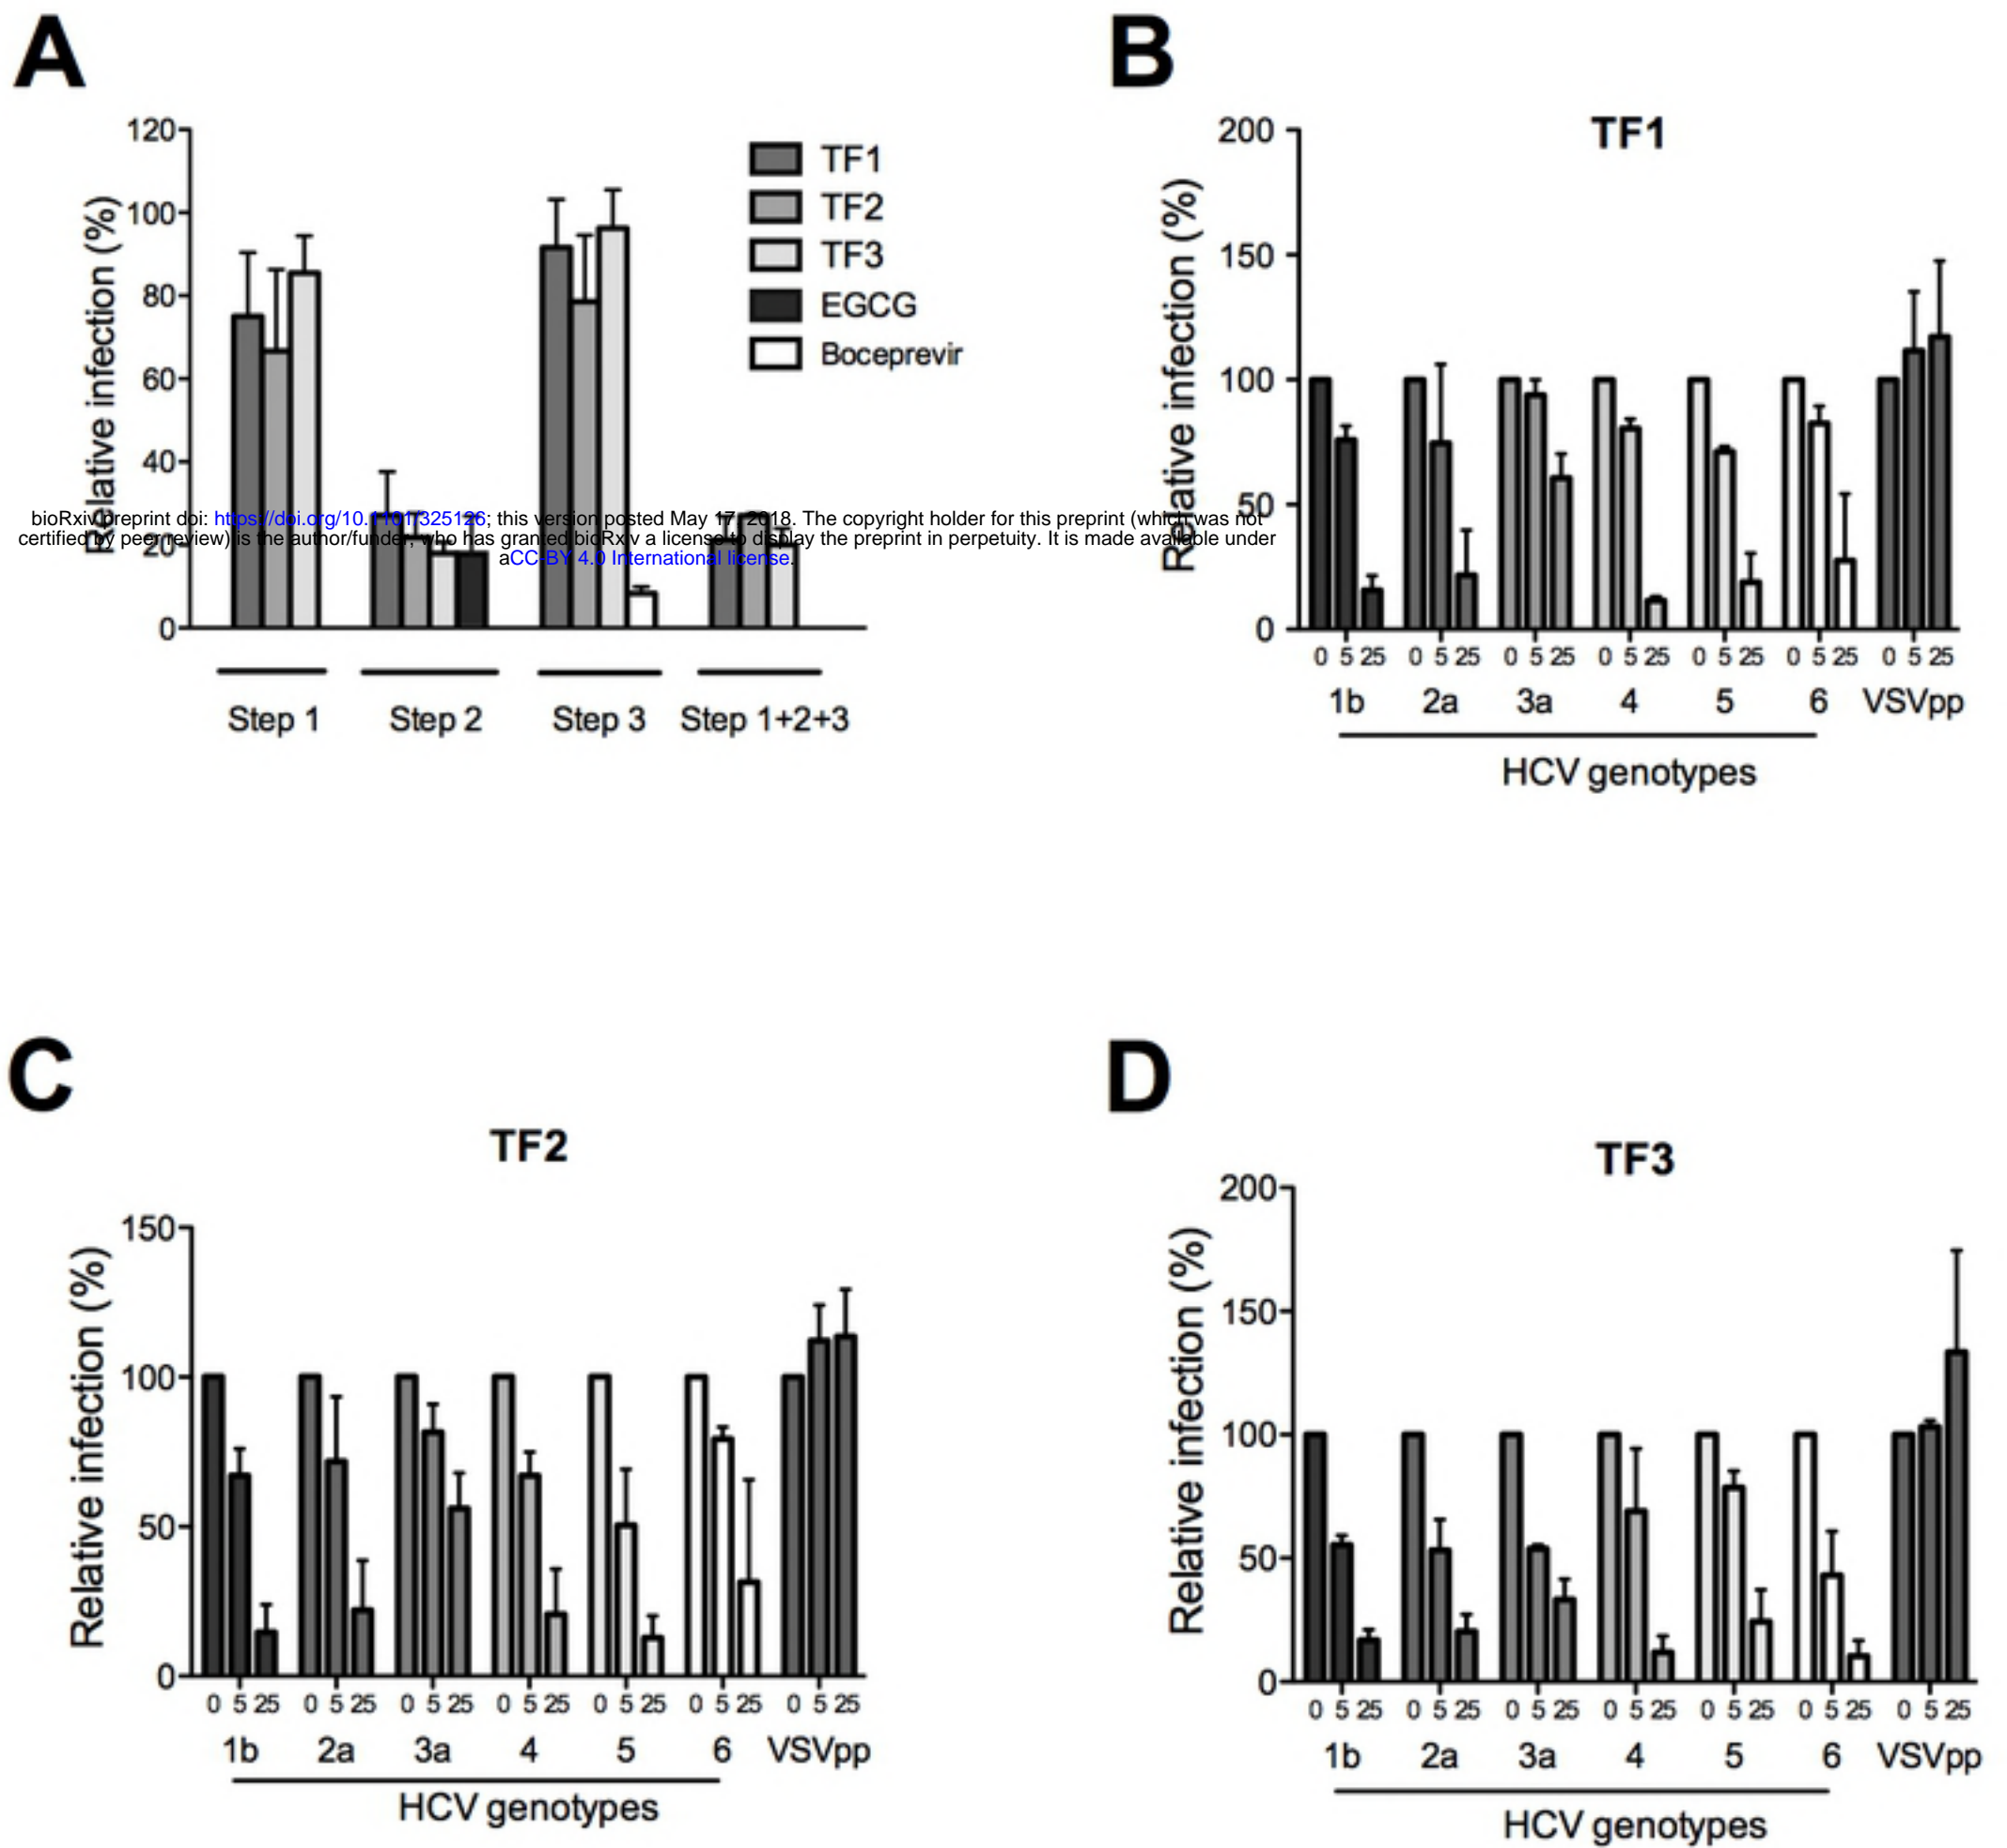

**Figure 3**

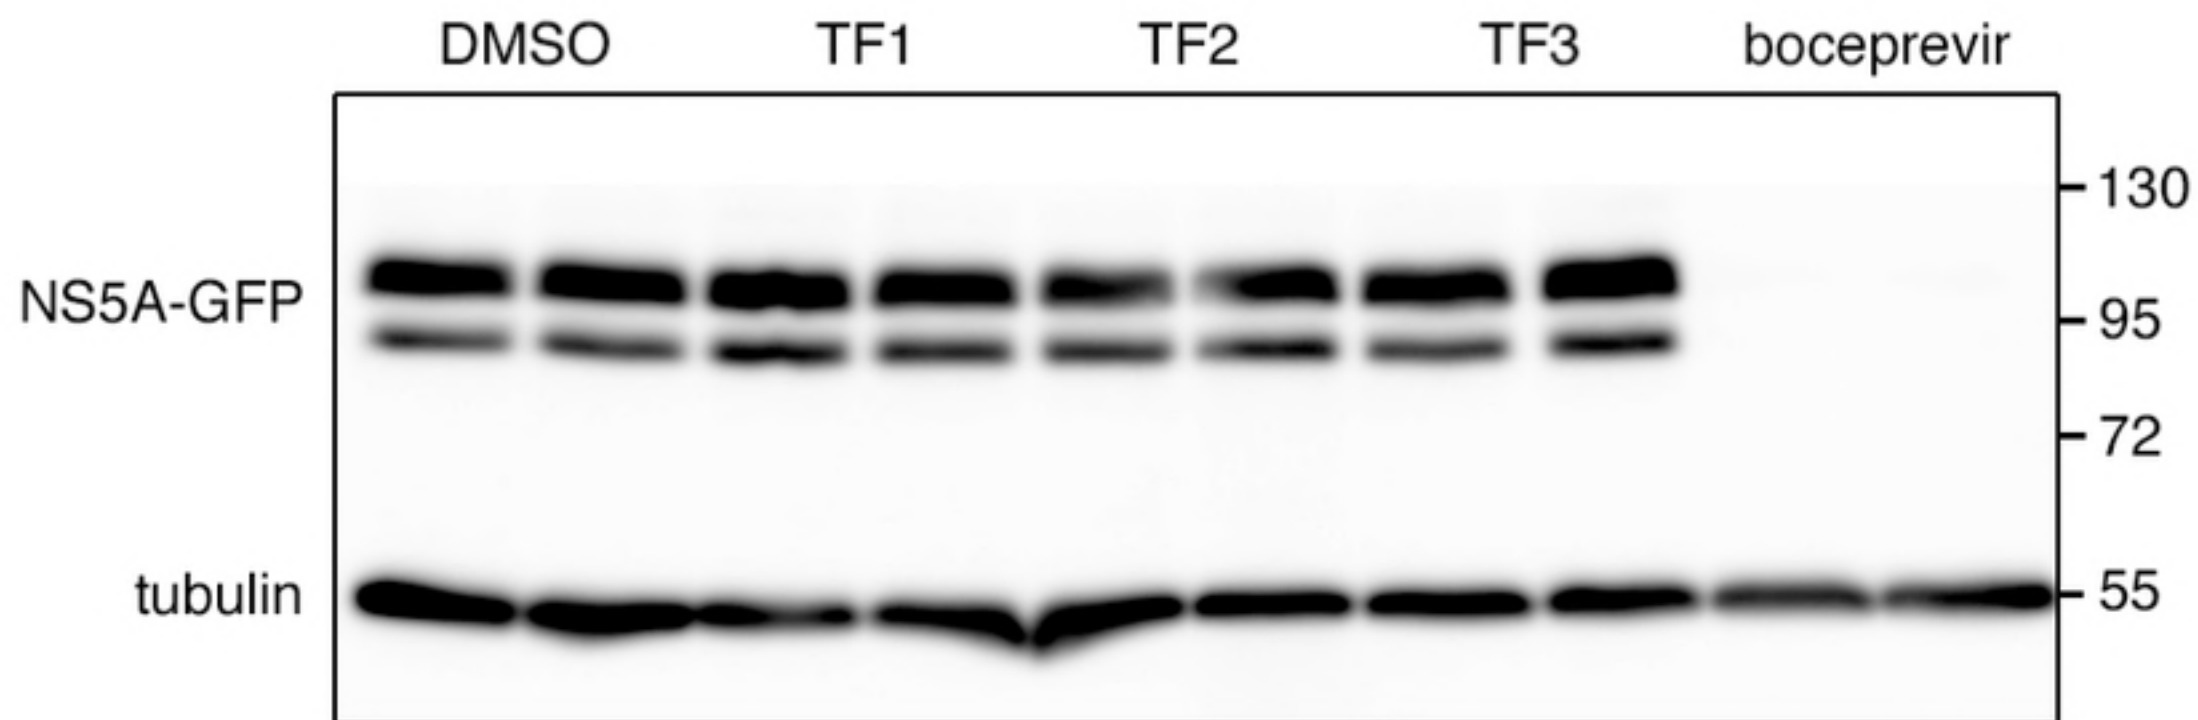

**Figure 4**



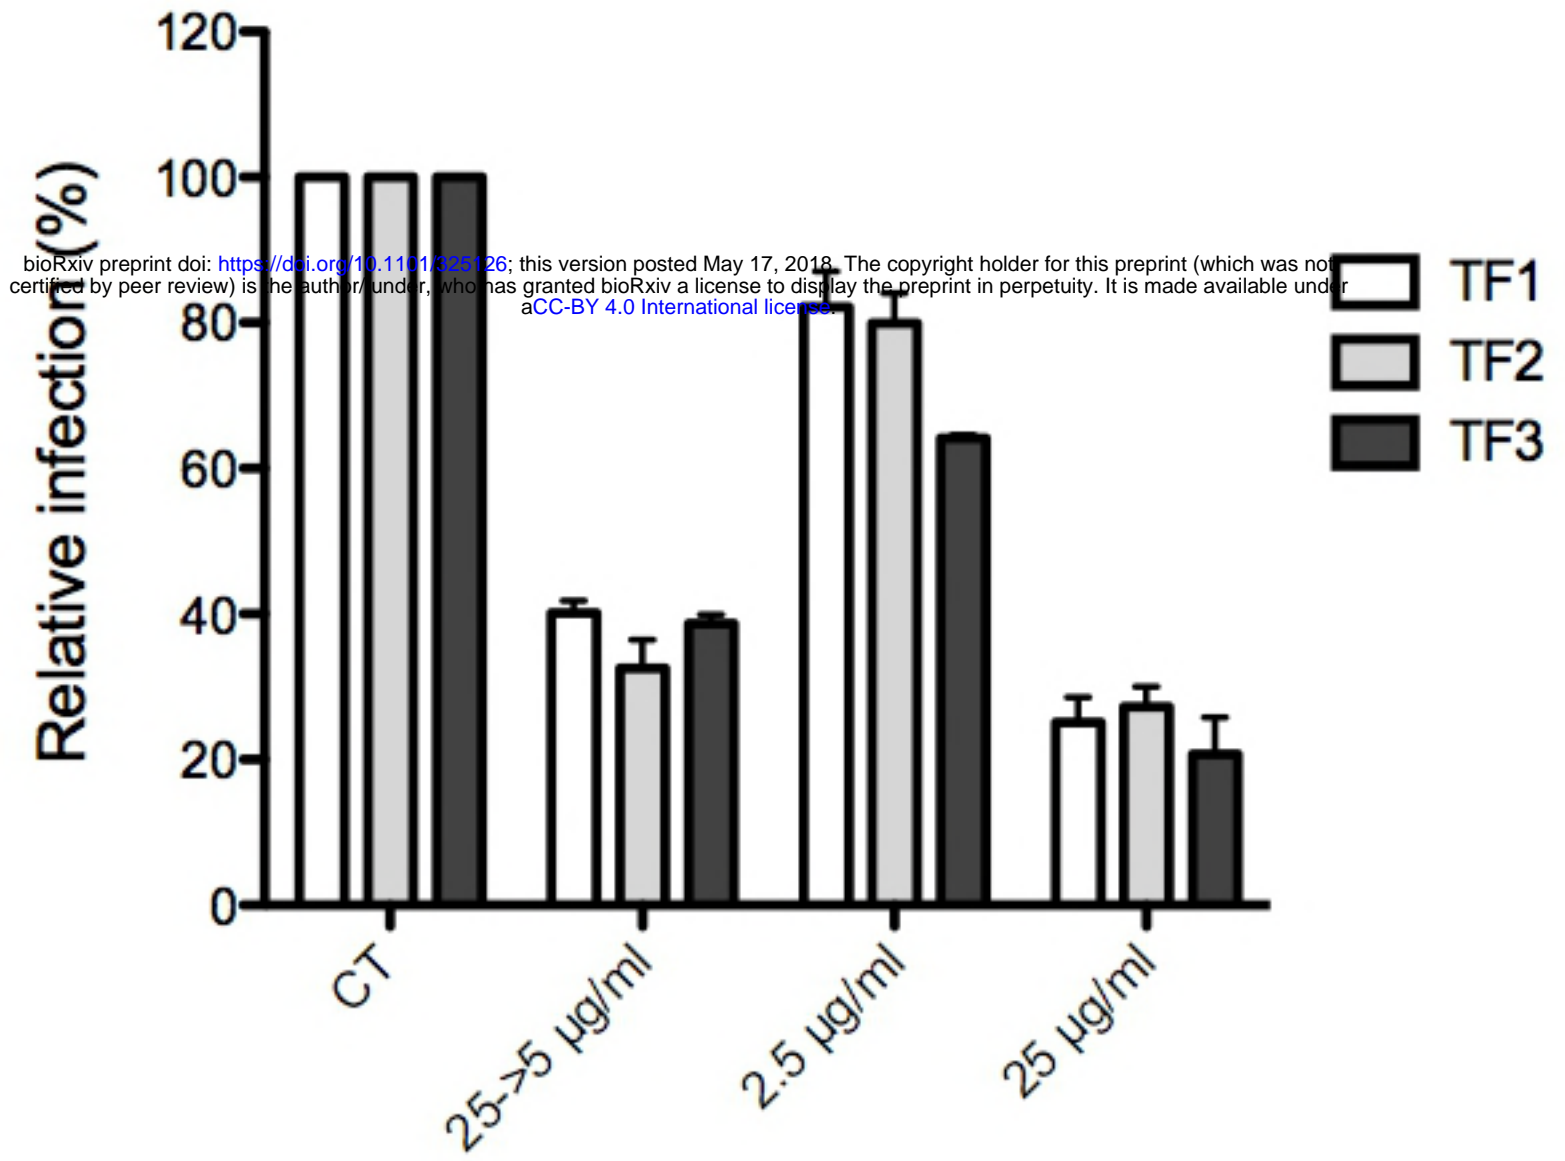

**Figure 5**

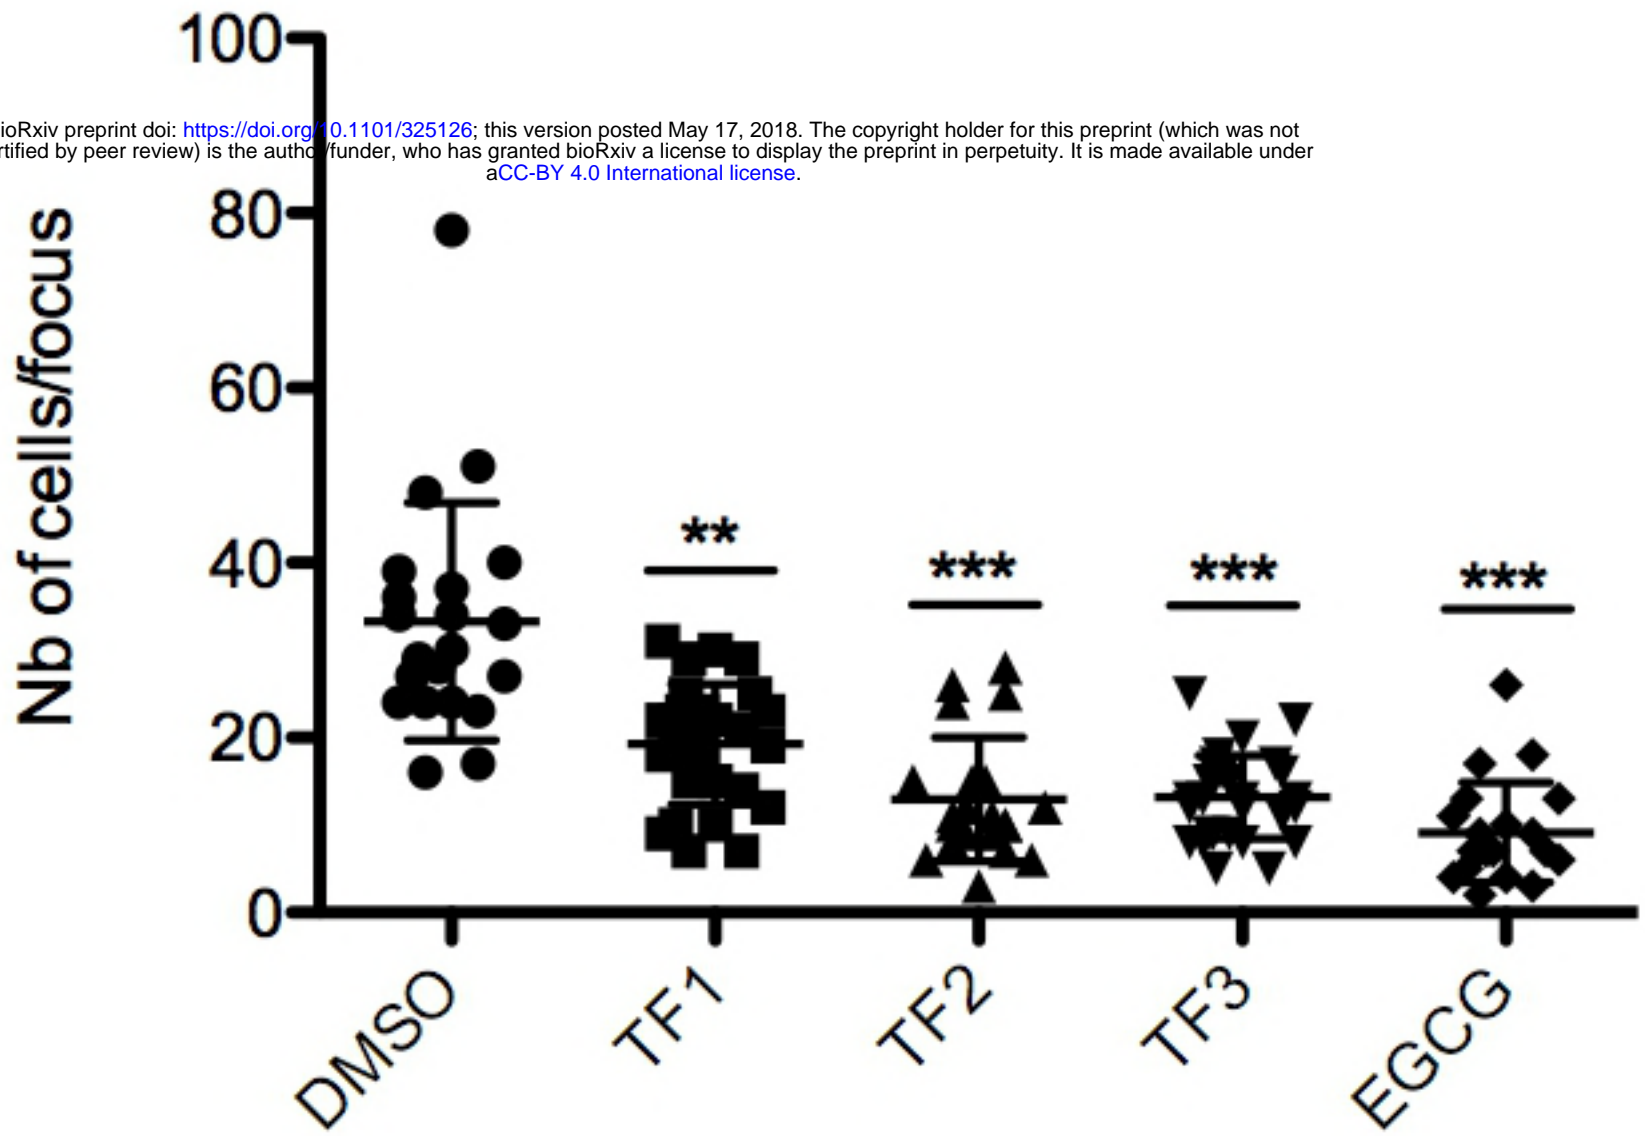

# Figure 6



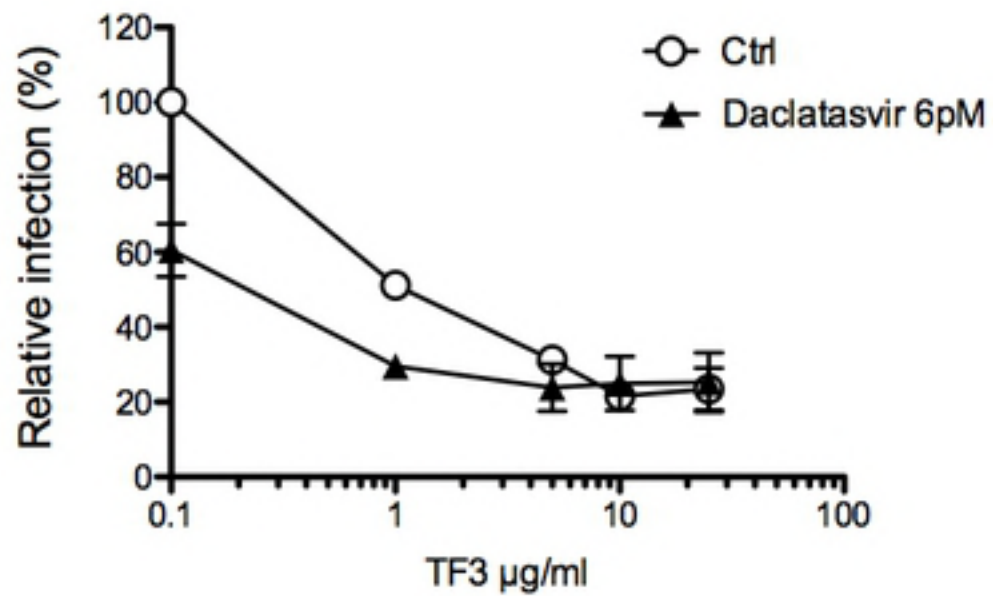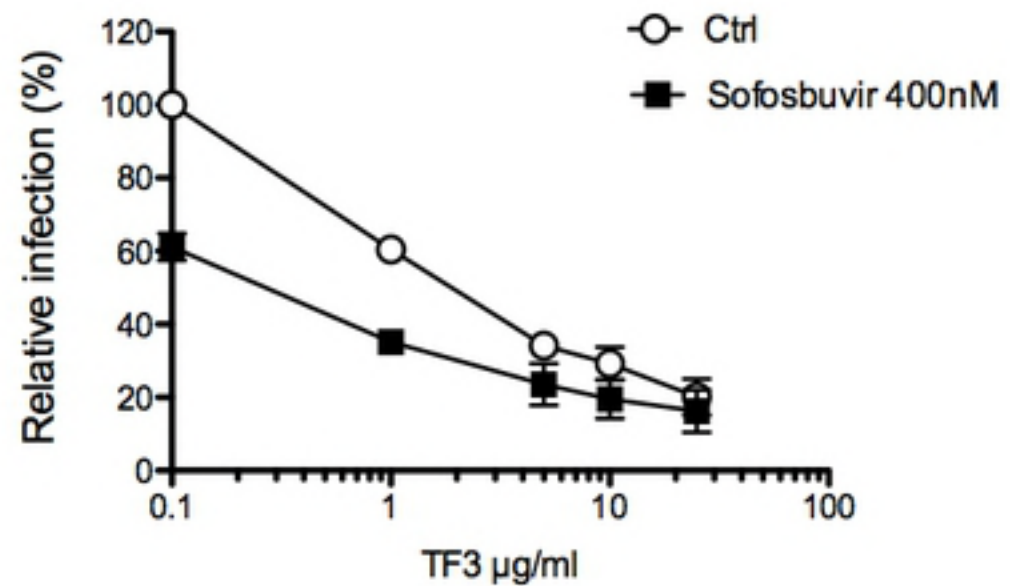

**Figure 7**
